# Supplementary material
Source: publisher site journal article supplement (https://www.dovepress.com/get_supplementary_file.php?f=302251.docx)
Supplement: Supplementary file 1 [file get_supplementary_file.php]

**Supplemental Table 1**. Loadings of the principal component 1 built upon 4 biomarkers.

| **Bone related biomarker** | **Loading** |
| --- | --- |
| **Osteopontin** | 0.779 |
| **Osteocalcin** | 0.867 |
| **Osteoprotegerin** | 0.811 |
| **FGF23** | 0.858 |
